# Supplementary material
Source: PubMed Central journal article supplement (PMC8178162)
Supplement: NIHMS1667659-supplement-5.pdf [file NIHMS1667659-supplement-5.pdf]

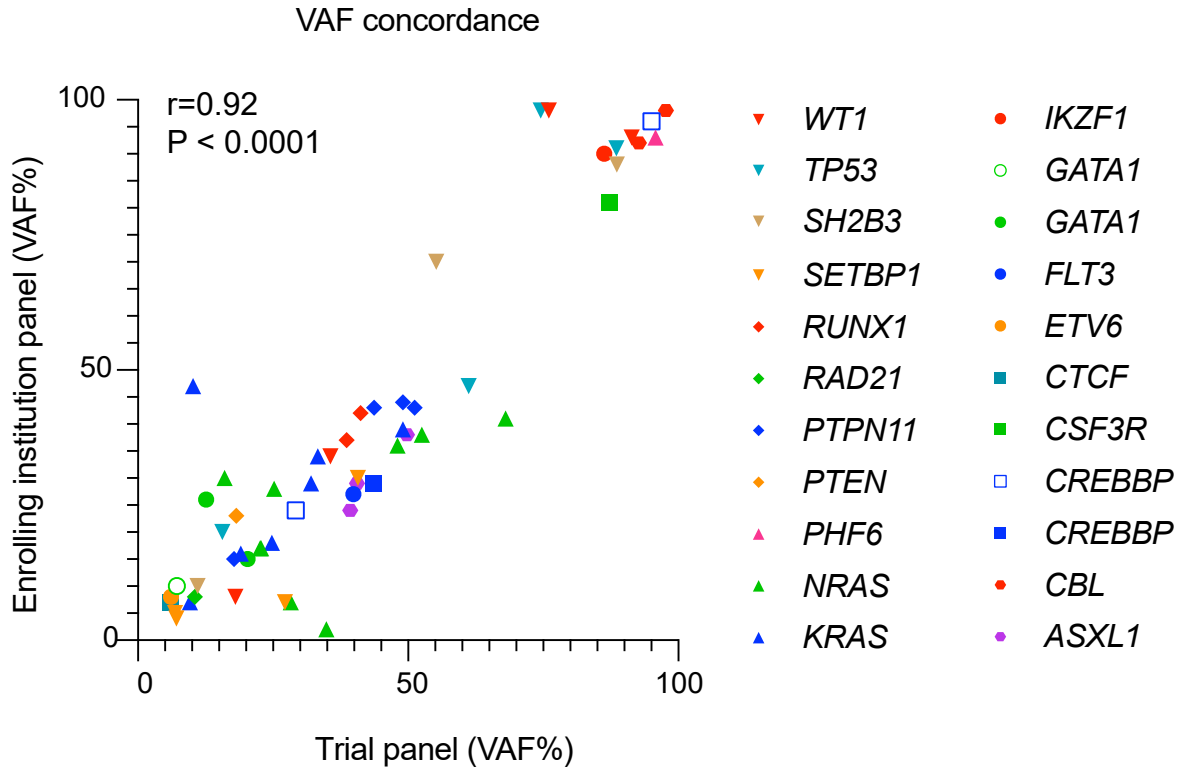

**Supplementary Figure 1: Significant concordance between clinical DNA-based NGS panels used in the LEAP Consortium study.** Graph shows each mutation with associated VAF using the trial panel (x-axis) compared to institutional panel where available (y-axis). Open circles show where frameshift mutations had different alignment between laboratories but with similar effect of the mutation on the protein.
