# Supplementary material
Source: PubMed Central journal article supplement (PMC8178162)
Supplement: NIHMS1667659-supplement-6.pdf [file NIHMS1667659-supplement-6.pdf]

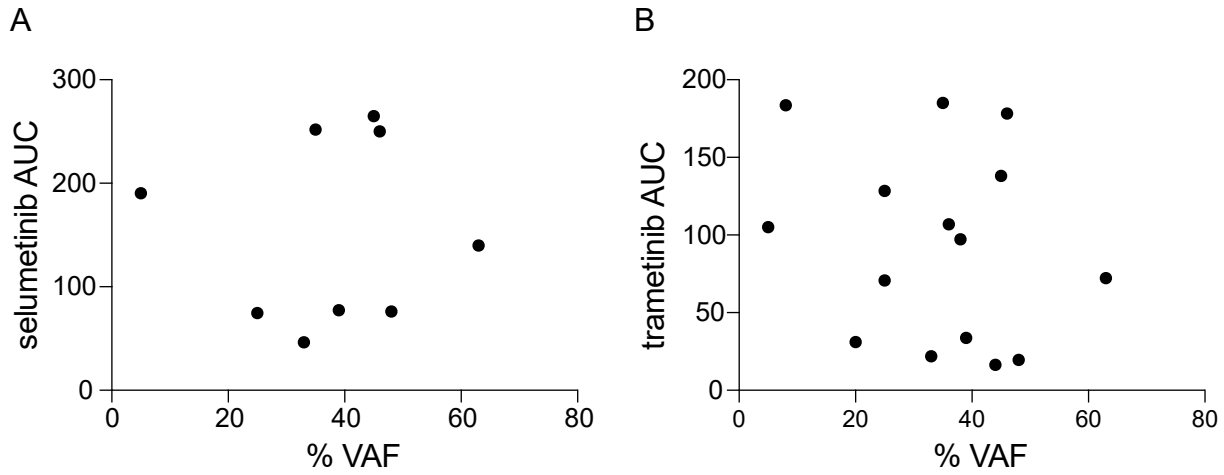

**Supplementary Figure 2: Correlation between Ras pathway mutation VAF and *in vitro* sensitivity to trametinib and selumetinib.** Graph shows the highest VAF for a Ras pathway mutation (NRAS, KRAS, PTPN11) (x-axis) compared to drug AUC for selumetinib (A) or trametinib (B).
